# Supplementary material for: Screening and identification of endometrial proteins as novel potential biomarkers for repeated implantation failure
Source: PeerJ. 2021 Mar 12;9:e11009. doi: 10.7717/peerj.11009 (PMC7958897; doi:10.7717/peerj.11009)
Supplement: Supplemental Information 2 [file peerj-09-11009-s002.xlsx]

## Sheet: rif
serial number	Infertility type	age	Infertility age	Endometrium	High-quality embryo	embryo	BMI	PT (s)	APTT (s)	TT (s)	Fib (G/L)	DD (mg/L)	FSH (IU/L)	E2 (pg/mL)	P (ng/mL)	PRL (ng/mL)	LH (IU/L)	T (ng/mL)	AMH (ng/mL)	E2(pg/mL)	P(ng/mL)
1	Oviduct factors	32	5.08	15.1	6	6	18.59	11.2	32.9	18.4	2.77	150	4.3	37	0.7	12.32	4.35	2.64		400	1.02
2	Oarium factors	35	8	9.6	7	8	19.63	10.2	26.5	18	2.93	280	9.51	56	0.46	12.5	4.74	0.5	1.83	953	0.72
3	Unknown causes	36	14	8.9	5	6	26.6	10.4	26.2	19.7	1.64	150	4.93	30	0.7	12.47	1.52	0.5	7.12	746	0.18
4	Oviduct factors	33	1	9.4	6	6	19.1	11.5	27.1	17.8	2.48	270	3.2	20	0.38	13.08	1.93	0.32	4.9	638	0.44
5	Oviduct factors	31	5	12.4	5	6	18.43	10.2	25.8	17.1	3.1	390	10.26	31	0.55	13.04	5.16	0.27		305	0.38
6	Ovulation disorders	33	3	11	6	6	20.19	11.1	42.4	18.2	1.87	360	3.7	20	0.59	9.14	1.91	0.34		487	0.38
7	Ovulation disorders	34	8	9.5	5	6	21.88	10.5	24.1	16.9	2.48	310	3.6	26	0.54	8.25	3.28	0.34		1115	0.12
8	Unknown causes	39	4.83	8.1	7	7	17.6	10.5	22.9	16.5	3.81	150	1.5	31	1.05	17.29	1.36	0.26		841	0.82
9	Oviduct factors	30	8	8.2	6	8	17.9	11.9	38	17.4	1.7	210	6.7	63	0.95	22.36	5.35	0.42	2.41	720	0.49
10	Oarium factors	36	5.17	11	4	5	18.4	11.5	33	16.8	2.77	350	9.1	20	0.79	19.47	3.36	0.38	3.39	1332	0.39
11	Oviduct factors	32	5	7.8	4	7	22.1	10.3	24.5	17.6	2.32	220	6.2	33	0.29	12.07	5.29	0.82	9.72	594	0.75
12	Oviduct factors	38	3	8.6	8	8	19.5	10.8	36	14.2	1.75	72	1.55	24	0.19	7.16	1.12	0.36	1.57	1001	0.1
13	Unknown causes	26	4.5	8.9	6	6	21.1	12	36.2	16.7	2.36	240	5.4	20	0.32	6.49	6.91	1.39		134	0.22
14	Oviduct factors	36	4	10.5	6	6	19.53	11.3	31.2	17.9	1.77	380	6.9	43	0.43	9.58	3.94	0.2	3.76	387	0.23
15	Oviduct factors	28	2.75	10.3	5	6	26.89	10.5	26.5	17.9	3.1	460	4.5	57	0.26	17.32	2.12	0.71	5.21	706	0.56
16	Ovulation disorders	32	6.42	7.2	5	7	18.9	11.1	33.6	18.1	2.27	220	5.9	47	0.52	24.37	6.92	0.52	5.11	533	0.48
17	Male factors	31	3	14.5	5	5	20.4	11	24.3	17.3	2.21	500	2.85	21	0.38	10.74	1.09	0.25	2.58	641	0.8
18	Oviduct factors	34	3.5	9.4	5	5	26.8	10.7	27.1	20.2	1.81	150	9.4	37	0.56	8.98	4.71	0.28		512	0.52
19	Pelvic cavity factors	33	6	9.8	6	8	18.6	12.1	31.3	17.7	2.41	200	3.7	28	0.98	12.11	1.29	0.34	1.32	232	1.17
20	Oviduct factors	29	1	7.8	8	10	19	11.6	26.8	18.9	1.83	220	6.4	54	0.27	10.52	4.98	0.43	5.4	503	0.88
21	Pelvic cavity factors	27	2.67	9.8	6	6	19.2	11.2	32.4	16.2	2.07	300	3.4	20	1.07	34.08	1.41	0.31		190	0.38
22	Oarium factors	30	2	8	5	6	21	11.4	26.7	18.3	2.27	200	5.51	37	0.34	11.99	2.87	0.5	0.88	762	0.31
23	Oviduct factors	30	2.5	10.5	5	5	18.8	10.9	30.4	17.2	2.15	160	2.62	20	0.85	20.95	1.39	0.45	6.09	804	0.49
24	Ovulation disorders	38	3	11.7	4	4	17.1	11.8	28.9	16.4	2.72	280	2.7	25	0.8	11.04	1.42	0.42	0.12	233	0.27
25	Ovulation disorders	32	8	7.1	6	7	19.7	11.2	30.2	17.9	2	150	3.1	20	0.36	7.46	1.14	0.57		338	0.48
26	Ovulation disorders	29	2.83	8.8	4	7	21.48	10.3	26.1	17.1	2.93	320	5.88	20	0.44	19.27	2.35	0.41		307	0.22
27	Ovulation disorders	34	4.83	8	6	6	18.4	10.7	28.5	18.3	2.77	160	7.2	27	1.07	18.48	4.27	0.67		313	0.24
28	Oviduct factors	37	4	12	5	5	24.7	12	25.1	18	2.49	660	7.28	43.31	1.08	12.06	2.99	1.4	0.79	865	0.31
29	Oviduct factors	35	3	9.1	6	6	24.8	10.5	33.6	17.3	2.02	150	5.3	20	0.7	12.87	3.88	0.33	3.38	449	0.72
30	Oviduct factors	36	2.33	8.9	8	9	19.78	11.2	27.2	17.7	2.27	150	4.5	27	0.26	19.96	2.05	0.28	1.49	412	0.32
31	Male factors	26	3	9.1	8	8	20.2	13.1	26.5	18.5	2.88	290	3.06	20	0.86	21.24	2.61	0.44	5.7	359	0.3
32	Pelvic cavity factors	31	4.58	10.3	5	6	21.83	10.4	23.4	17.1	2.78	870	2.8	20	0.27	11.58	2.23	0.41		386	0.29
33	Oviduct factors	37	6.75	10	6	6	23.63	10.6	24.3	18	2.27	400	4.9	36	0.74	8.42	1.91	0.68	1.11	570	0.89
34	Oviduct factors	38	2	7.4	5	8	20.7	11.4	27.2	17.3	3.12	150	10.08	38	0.78	9.42	4.29	0.47	1.14	338	0.39
35	Unknown causes	26	3	10.2	6	6	20.8	10.8	26.7	2.69	2	160	8.84	42	0.71	6.16	8.27	0.65	2.69	259	0.53
36	Oviduct factors	37	1	9.1	4	5	26.67	11	28.8	18	2.93	460	6.36	26	0.51	13.64	3.98	0.29	1.19	750	0.23
37	Oviduct factors	26	2	9.6	4	5	27.5	11.6	22.6	17.8	3.58	150	3.9	26	0.63	20.54	2.69	0.44	5.12	588	0.44
38	Oviduct factors	36	5	11.2	5	5	23	11.5	25	18.6	2.35	460	4.7	20	0.46	25.5	0.99	0.39	3.32	320	0.99
39	Oviduct factors	35	5	8.3	7	7	21.8	9.9	26.1	18.5	1.8	150	7.2	40	0.45	6.38	1.56	0.64	3.37	507	0.33
40	Male factors	26	4	11.3	2	4	20.5	11.3	25.3	15.7	4.88	150	3.06	20	1.49	10.3	2.05	0.35	9.7	643	0.33
	MEAN	32.6	4.3185	9.71	5.55	6.325	21.0682	11.08	28.535	17.2473	2.4915		5.29975		0.6195	14.015	3.142	0.53425	3.58607	554.325	0.47775
	SD	3.90135	2.49024	1.77342	1.28002	1.3085	2.84731	0.652097	4.46442	2.57697	0.648409		2.36973		0.294034	6.17533	1.82861	0.426109	2.55078	268.315	0.265286
	MEDIAN											220		27
	IQR											202.5		17.25

## Sheet: con
serial number	Infertility type	age	Infertility age	Endometrium	High-quality embryo	embryo	BMI	PT (s)	APTT (s)	TT (s)	Fib (G/L)	DD (mg/L)	FSH (IU/L)	E2 (pg/mL)	P (ng/mL)	PRL (ng/mL)	LH (IU/L)	T (ng/mL)	AMH (ng/mL)	E2(pg/mL)	P(ng/mL)
1	Ovulation disorders	34	4.75	9.8	2	2	21	11.3	38.1	18.2	1.81	70	3.6	76	0.38	6.73	5.71	0.29	1.91	514	0.25
2	Male factors	26	3	12.3	1	1	17.6	12.6	34.7	17.2	2.23	560	2.4	20	0.62	17.12	0.59	0.31	9.63	411	0.71
3	Oviduct factors	30	1	11.8	2	2	26.6	10.9	29.1	16.4	4.68	240	1.9	21	0.57	24.21	1.85	0.85	1.44
4	Male factors	26	2	14.8	2	2	16.9	11	31.1	18.4	1.98	240	7.9	45	0.32	19.74	3.97	0.49
5	Unknown causes	35	4	8	2	2	21.1	10.9	35.3	17.8	1.81	210	6.5	36	1.03	21.07	5.76	0.53	6.54	436	0.8
6	Oarium factors	35	1	8.3	2	2	19.43	10.3	32	18.2	1.87	180	5.6	47	0.96	27.73	3.22	0.47	0.56
7	Oarium factors	37	2	12	2	2	27.29	10.6	28.8	19.1	1.75	210	7.3	21	0.27	12	2.84	0.3	1.34
8	Oviduct factors	29	3.17	10.3	1	2	16.8	10.6	24.9	15.6	2.16	150	9.63	83	0.11	8.75	5.72	0.59	5.19	426	0.69
9	Pelvic cavity factors	29	4	8.3	2	2	19.02	10.5	25.7	17.8	2.37	170	7.88	33	1.49	29.54	6.86	0.52	5.45	1319	0.75
10	Oviduct factors	37	1	8.8	2	2	18.5	11.5	26	17.7	2.02	150	7.14	43	0.4	15.85	6.73	0.43	3.42	328	0.31
11	Oarium factors	37	6	9.9	2	2	22.9	10.5	27	16.8	3.1	600	8.2	24	0.1	5.04	3.95	0.58	1.23	228	0.59
12	Oarium factors	30	2	10.5	2	2	25.1	11.5	30.4	16.9	2.68	150	7.06	90	3.63	6	3.94	0.62	0.67	317	0.33
13	Oviduct factors	26	2.5	8.5	2	2	19.5	11.3	25.4	18.6	2.16	200	4.62	20	0.28	11.11	1.21	0.3	2.71	807	0.1
14	Oviduct factors	35	0.5	8	1	2	18.75	11.3	30.6	17.6	2.55	240	2.26	20	0.45	15.27	1.4	0.26	5.27	278	0.51
15	Oviduct factors	30	5.92	12	2	2	20	11.8	28.5	16.7	3.73	770	4	49	0.52	12.83	0.78	0.32
16	Oviduct factors	37	6	9.5	2	2	20.6	10.5	24.9	17.4	3.04	150	7.26	56	0.32	19.83	4.59	0.45	3.92	514	0.56
17	Oviduct factors	35	1.5	10	2	2	23.6	12.2	26.8	16.7	2.68		5.62	32	0.41	8.96	2.12	0.52	1.08
18	Oviduct factors	37	4	5.7	2	2	19.5	10.9	23	19	2.35	200	5.21	20	0.36	13.18	1.95	0.31	2.16	890	0.4
19	Male factors	31	2	11	2	2	20.5	10.5	20.4	18.9	2.27	260	3.87	20	0.16	15.15	1.7	0.13
20	Oviduct factors	36	1	9.3	1	1	18.8	11.7	27.1	17.2	3.5	380	2.13	22	0.13	12.79	3.51	0.52	4.57	329	0.27
21	Oviduct factors	37	0.5	9.1	2	2	22.5	11.6	23.7	18.3	2.11	200	7.53	20	0.1	10.82	6.17	0.3	1.11	1421	0.42
22	Oviduct factors	30	2	6.9	1	2	20.5	12.1	27.3	17.3	2.34	150	4.73	42	0.73	11.85	2.58	0.26	1.08
23	Ovulation disorders	30	3	9.1	2	2	21.1	10.8	32.2	13.3	3.96		3.56	20	0.63	8.56	0.85	0.28	3.44	389	0.15
24	Ovulation disorders	34	4	13.7	2	2	18.4	11.4	27.9	18.6	1.59	230	4.6	20	1.06	5.53	1.26	0.31		433	0.57
25	Oviduct factors	35	8	11.9	2	2	22.9	12.9	26	17.3		194	3.7	23	0.34		2.28			1886	0.74
26	Ovulation disorders	33	4	13.7	2	2	22	10.4	31.4	17.5	2.3	780	4.5	33	0.66		1.42				0.87
27	Oviduct factors	31	7	10.3	2	2	26	11.2	26.9	16	2.88		4.77	52.98	0.58	16.03	2.4	1.67
28	Ovulation disorders	36	5	7.8	2	2	24	11.3	25.5	17.9	2.42	380	5.5	24	1.4	9.15	5.02	0.47	7.15	339	0.21
29	Ovulation disorders	39	2.5	16.4	2	2	21.23	11.1	31.8	17	2.32	660	7.7	44	1.14	11.72	1.83			960	0.15
30	Ovulation disorders	34	4	10.7	1	1	19.6	11.5	25.9	16.8	3.41	230	5.92	62.3	1.73		4.8			433	0.57
31	Oarium factors	31	2.17	14.1	2	2	18.8	11.1	37.7	17	2.15	180	4.8	31	0.17	14.61	4.16	1.08		985	0.54
32	Oviduct factors	33	14.83	8.7	0	2	18.52	10.7	25.2	18.6	2	330	7.3	51	0.33	20.46	5.86	0.64		313	0.26
33	Ovulation disorders	31	3.42	13	2	2	22	9.8	24.1	18.8	2.26	150	5.6	28	0.28	4.12	2.07	0.24		398	0.21
34	Ovulation disorders	36	3.42	8.6	2	2	18.4	11	21.9	18.4	2.35	360	8.4	39	0.47	10.75	5.04	0.75	6.51	670	0.42
35	Oarium factors	33	7	9.2	2	2	18.9	10.6	24.9	18.1	1.88	220	9.7	40	0.84	17.5	4.85	0.18		486	0.64
36	Unknown causes	39	8.83	11.2	2	2	22.9	11.5	35.7	17.2	1.81	530	6.4	20	0.69	7.88	3.92	1.56	3.89
37	Oarium factors	36	5	9.9	2	2	20.7	11.2	35.8	18	2.23	150	2.8	29	0.4	14.95	0.72	0.36	5.91	609	0.4
38	Oviduct factors	32	1	8.1	1	2	18.44	11.7	29.6	18.1	2.44	150	7.2	92	1.39	11.82	10.28	0.39	1.57
39	Ovulation disorders	32	7	14	1	2	21.6	11.9	32.7	17.2	2.26	150	10.1	47	1.21	21.17	3.47	0.42		474	0.4
40	Pelvic cavity factors	33	6	10.3	2	2	18.52	10.7	29.3	18	2.09	410	4.7	20	0.77	27.55	2.32	0.37		1149	1.39
41	Oviduct factors	27	3.33	12.4	2	2	22.5	11.1	32.7	18	1.67	1210	4.2	20	1.04	16.6	2.06	0.46	3.88	1911	0.91
42	Oviduct factors	36	10	8	2	2	21.5	10.8	24.9	16.8	2.48	150	2.8	20	0.27	3.71	1.46	0.32			1.03
43	Unknown causes	35	7.83	12.2	2	2	22.48	11.5	32	17.9	3.33	230	1.6	31	1.27	11.6	1.43	0.62	1.89	363	1.64
44	Ovulation disorders	32	2	14	2	2	20.4	10.9	33.7	17.6	1.97	150	6.2	26	0.57	10.05	2.75	0.28
45	Oviduct factors	27	4	9.5	2	2	20.4	11.4	29.9	18.1	2.11	150	7.53	54	0.35	10.48	4.18	0.46	3.28
46	Male factors	31	3	9.8	2	2	19.4	10.2	27.6	17.6	2.69	180	3.73	23	0.35	22.62	0.69	0.21	1.77
47	Unknown causes	31	3	8.8	1	2	23.7	11.9	37.2	16.8	3.12	170	5.9	53	0.89	8.58	3.63	0.76		405	0.87
48	Oviduct factors	33	1	7.9	2	2	24.14	11.1	28	18.1	2.23	190	5.9	31	0.23	11.55	1.64	0.27	1.01	392	0.3
49	Oviduct factors	35	1	12.2	2	2	21.16	10.6	27.9	15.4	4.82	1820	8	142	1	9.98	3.13	0.58
50	Ovulation disorders	29	2	14.2	2	2	20.5	12.4	40.6	17.3	2.38	340	5.9	21	0.54	6.25	1.47	0.4
51	Pelvic cavity factors	37	1	10	2	2	18.07	10.3	29	18.1	1.94	150	8.97	20	0.57	9.79	3	0.18	1.12
52	Ovulation disorders	38	6	11.8	2	2	20.51	12.1	37.8	18	2.04	430	3.4	20	0.56	9.99	0.9	0.47
53	Ovulation disorders	38	6.25	7.3	2	2	25.15	11.6	30.7	18.4	2.57		7.3	32	0.39	15.44	2.38	0.56	0.68	261	1.36
54	Pelvic cavity factors	31	1	7	2	2	20.7	11.2	27.6	16.9	3.81		2.5	20	0.44	13.7	1.54	0.27	1.83
55	Unknown causes	26	1.25	13	2	2	20.5	11.3	24.4	18.3	2.21	460	3.13	20	0.36	17.38	1.57	0.45
56	Ovulation disorders	32	1	8	1	2	24.93	11.8	31.2	20.3	2.99		4.5	20	0.1	7.13	1.18	0.5
57	Pelvic cavity factors	34	3	8.6	2	2	21.48	11.1	26.1	18.3	2.57	220	3.94	20	0.44	9.66	0.2	0.2	2.64	247	0.32
58	Pelvic cavity factors	27	2	11.6	2	2	18.6	10.5	25.4	17.4	2.41	170	3	24	0.46	10.85	2.16	0.42	1.53
59	Oviduct factors	29	5	10.5	1	2	23	10.4	28.7	17.4	2.09	150	5.25	20	0.86	10.25	1.94	0.68	2.52
60	Male factors	26	7.83	9	2	2	19.95	10.8	25.8	16.3	4.48	280	1.8	69	1.76	10.92	2.06	0.34		328	0.44
61	Ovulation disorders	34	1	10.2	2	2	25.64	12	32.4	20.5	2.15	180	5	20	0.56	9.29	1.93	0.38	3.49
62	Oarium factors	33	4	9	2	2	18	11.4	35.6	18.4	1.35		3.96	20	0.42	22.83	2.64	0.34	3.77
63	Male factors	38	5	8.4	2	2	23.56	10.3	24.1	16.4	3.43	320	5.41	20	1.22	8.07	1.05	0.54	2.13	828	0.35
64	Oviduct factors	28	2	12.2	2	2	19.7	11	25	16.6	3.29	500	7.49	37	1	13.41	1.66	0.35	7.52	564	0.38
65	Unknown causes	33	10	7.8	2	2	21.2	10.5	24.2	17.3	2.73	150	4.12	25	0.76	35.11	1.93	0.79	3.04	567	0.2
66	Oarium factors	26	3	10.1	2	2	23.6	11.8	24.9	18.1	2.4	150	5.86	27	0.25	10.84	13.23	0.57	8.48	753	0.38
67	Unknown causes	32	4	8.3	2	2	21.6	11.5	30.7	17.8	2.38	150	3.17	20	0.5	21.93	2.38	0.54	3.49	458	0.15
68	Oviduct factors	26	2	14.5	2	2	25.4	10.6	28.8	17.8	2.88	410	3.98	50	1.46	23.31	2.44	0.74	4.1	243	0.61
69	Unknown causes	26	3	10.5	2	2	19.1	11.5	30	18.2	1.1	300	2.55	20	0.54	14.23	1.44	0.46	2.3
70	Oviduct factors	27	2.5	8.9	1	1	20.4	11.6	28.7	17.2		410	4.64	46	0.8	24.7	3.57	0.48	3.86
71	Oviduct factors	36	10	11.4	1	2	18.3	11.6	26.2	17.8	2.06	150	4.31	20	0.75	11.59	1.38	0.36	4.47	268	0.33
72	Oviduct factors	32	7	10.8	1	2	27.9	10.7	21.8	18	1.97	210	6.5	29	0.77	12.06	4.54	0.49	4.76	590	0.28
73	Oviduct factors	36	10	11.8	2	2	21.1	11.5	27.5		3	260	3.27	20	0.41	8.54	0.81	0.37		410	0.22
74	Male factors	28	1	12.5	1	2	24.8	10.6	27	17.8	2.78	640	3.21	21	0.39	9.85	1.78	0.46	3.59
75	Oviduct factors	40	8	17.3	2	2	21.5	10.3	0.86				3.79	20	0.1	11.29	2.28	0.1	1.82
76	Oviduct factors	37	3	9.8	2	2	25.8	10.6	25.4	17.4	2.83	580	9.5	29	0.37	9.78	4	0.49	0.71	365	0.31
77	Oviduct factors	33	1	11.5	1	1	17.5	11.3	28.9	18.9	1.86	790	7.94	35	0.2	17.43	1.45	0.24	5.46
78	Ovulation disorders	30	3	10.9	1	2	23	10.7	27.5	17.3	3.26	200							1.61	251	0.82
79	Oviduct factors	35	1	12.2	1	1	21.1	13.1	31.7	16.5	2.9		2	20	0.17	26.46	1.53	0.26	1.5
80	Oviduct factors	37	2	12	2	2	22.1	11.4	23.4	18.4	3.79	111	3.43	20	0.84	9.13	2.36	0.3	2.1
	MEAN	32.6	3.875	10.5175	1.75	1.925	21.2609	11.1737	28.3895	17.6282	2.54039		5.25658		0.650506	13.8651	2.93	0.463467	3.23818	585.783	0.523125
	SD	3.84049	2.84458	2.27484	0.463886	0.265053	2.55234	0.638381	5.2401	1.02005	0.7226		2.13425		0.522508	6.45856	2.14612	0.260402	2.12942	398.969	0.337753
	MEDIAN											210		25
	IQR											230		22.5
